# Supplementary material for: Forward and Backward Inference in Spatial Cognition
Source: PLOS journal article supplement (doi:10.1371/journal.pcbi.1003383), 2013-12-12
Supplement: S1 (10.1371/journal.pcbi.1003383.s001) [file journal.pcbi.1003383.s001]

## Text S1: Forward and Backward Inference in Spatial Cognition

Will D. Penny, Peter Zeidman and Neil Burgess

### Local Linearisation

If the deterministic part of the dynamics evolve according to a linear differential equation

$$\dot{\mathbf{x}} = \mathbf{A}\mathbf{x} + \mathbf{B}\mathbf{u} \quad (1)$$

then a discrete time update is given by

$$\mathbf{x}(t) = \exp(\mathbf{A}t)\mathbf{x}(0) + \int_0^t \exp(\mathbf{A}(t-\tau))\mathbf{B}u(\tau)d\tau \quad (2)$$

For time step  $n$ , if we assume that  $u(t) = 0$  except at  $t = t(n)$  then we have

$$\mathbf{x}_n = \exp(\mathbf{A}dt)\mathbf{x}_{n-1} + \mathbf{B}u_n \quad (3)$$

where  $dt$  is the time step. If  $\mathbf{u}_n$  is not changing quickly we have  $\mathbf{u}_n = \mathbf{u}_{n-1}$ . For nonlinear dynamics

$$\dot{\mathbf{x}} = \mathbf{f}(\mathbf{x}, \mathbf{u}) \quad (4)$$

then we can write

$$\mathbf{x}_n = \mathbf{F}_n\mathbf{x}_{n-1} + \mathbf{H}_n\mathbf{u}_{n-1} \quad (5)$$

where the flow matrices are given by

$$\begin{aligned} \mathbf{F}_n &= \exp(\mathbf{J}(\mathbf{f}, \mathbf{x})dt) \\ \mathbf{H}_n &= \mathbf{J}(\mathbf{f}, \mathbf{v})dt \end{aligned} \quad (6)$$

and  $\mathbf{J}(\mathbf{f}, \mathbf{x})$  is the Jacobian matrix of the function  $\mathbf{f}$  with respect to  $\mathbf{x}$  (matrix of first derivatives). In forward inference, these are evaluated at  $\mathbf{x} = \mathbf{m}_{n-1}$  and  $\mathbf{u} = \mathbf{u}_{n-1}$  (for known causes) or  $\mathbf{u} = \mathbf{r}_{n-1}$  (for estimated causes).

However, our evaluations of the above approximations for  $\mathbf{F}_n$  and  $\mathbf{H}_n$  showed considerable inaccuracies for a range of angles,  $\phi$ . We therefore adopted the following ‘local regression’ approach which is similar to that proposed by Schaal [28]. This used multiple, typically 10, expansion points sampled from the previous posterior  $(\mathbf{m}_{n-1}, \mathbf{P}_{n-1})$ . For each, we evaluated the gradient  $\mathbf{f}(\mathbf{x}, \mathbf{u})$  and estimated the next state based on a first order Euler method. We then regressed the next states onto previous states and computed  $\mathbf{F}_n$  and  $\mathbf{H}_n$  using least squares regression.
