# Supplementary material for: Forward and Backward Inference in Spatial Cognition
Source: PLOS journal article supplement (doi:10.1371/journal.pcbi.1003383), 2013-12-12
Supplement: S4 (10.1371/journal.pcbi.1003383.s004) [file journal.pcbi.1003383.s004]

301 Moved Permanently

# Moved Permanently

The document has moved here.

---

Apache Server at www.ploscompbiol.org Port 80
